# Supplementary material
Source: PubMed Central journal article supplement (PMC8489730)
Supplement: NIHMS1698101-supplement-SUN_Credit_Roster.pdf [file NIHMS1698101-supplement-SUN_Credit_Roster.pdf]

**Investigators:**

1. Massimo Accorinti, MD, PhD  
Dipartimento Testa-Collo  
Sapienza University of Rome  
Rome, Italy
2. Nisha Acharya, MD, MS  
Francis I. Proctor Foundation  
University of California, San Francisco  
San Francisco, CA USA
3. Radgonde Amer, MD  
Uveitis and Ocular Immunology Service  
Hadassah University Hospital  
Jerusalem, Israel
4. Leyla S. Atmaca, MD  
Ankara, Turkey
5. Asaf Bar, MD  
UCL/Institute of Ophthalmology and Moorfields Eye Hospital  
London, England United Kingdom
6. Talin Barisani-Asenbauer, MD, FEBO  
Medical University Vienna  
Vienna, Austria
7. Matthias D. Becker, MD, PhD, FEBO  
Department of Ophthalmology  
Triemli Hospital  
Zürich, Switzerland
8. Marie-Lyne Bélair, MD, FRCSC  
Université de Montréal  
Montréal, Québec Canada
9. Rubens Belfort, Jr., MD, PhD, MBA  
Vision Institute  
Federal University of Sao Paulo  
Sao Paulo, Brazil

## SUN Credit Roster

---

10. Nirali P. Bhatt, MD  
Scheie Eye Institute  
University of Pennsylvania Perelman School of Medicine  
Philadelphia, PA USA
11. Jyotirmay Biswas, MS, FMRF, FNAMS, FIC Path., FAICO  
Uveitis & Ocular Pathology Department  
Medical Research Foundation  
Chennai, India
12. Barbara Blodi, MD  
Fundus Photograph Reading Center  
Department of Ophthalmology and Visual Sciences  
University of Wisconsin School of Medicine and Public Health  
Madison, WI USA
13. Bahram Bodaghi, MD, PhD  
Department of Ophthalmology  
University of Paris VI, Hopital Pitie-Salpetriere  
Paris, France
14. Antoine P. Brézin, MD, PhD  
Department of Ophthalmology  
University of Paris V - Hôpital Cochin  
Paris, France
15. Nicholas J. Butler, MD  
Department of Ophthalmology  
Harvard Medical School  
Boston, MA USA
16. Laure Caspers, MD  
Department of Ophthalmology  
Université Libre de Buxelles  
Brussels, Belgium
17. Soon-Phaik Chee, MBBS, M Med(Ophth), FRCS(Glasg), FRCS(Ed), FRCOphth  
Department of Ophthalmology  
Singapore National Eye Centre, Yong Loo Lin School of Medicine  
Singapore, Singapore

## SUN Credit Roster

---

18. Ronald P. Danis, MD  
Fundus Photograph Reading Center  
Department of Ophthalmology and Visual Sciences  
University of Wisconsin School of Medicine and Public Health  
Madison, WI USA
  
19. Janet L. Davis, MD  
Bascom Palmer Eye Institute  
University of Miami Miller School of Medicine  
Miami, FL USA
  
20. Marc D. de Smet, MDCM, PhD, FRCSC FRCOphth, FMH, FARVO  
Societe MIOS SA  
Lausanne, Switzerland
  
21. Alastair Denniston, MD  
University Hospitals Birmingham NHSFT  
University of Birmingham  
Birmingham, United Kingdom
  
22. Jean Deschênes, MD  
Department of Ophthalmology  
McGill University Health Center  
Montréal, Québec Canada
  
23. Andrew D. Dick, FBS, FMedSci  
Academic Unit of Ophthalmology  
Bristol Medical School  
Bristol, United Kingdom
  
24. Emilio M. Dodds, MD  
Consultores Oftalmológicos  
Buenos Aires, Argentina
  
25. James P. Dunn, MD  
Department of Ophthalmology  
Wills Eye Hospital, Thomas Jefferson University School of Medicine  
Philadelphia, PA USA
  
26. John V. Forrester, MD  
Institute of Medical Sciences  
University of Aberdeen  
Scotland, United Kingdom

## SUN Credit Roster

---

27. C. Stephen Foster, MD  
Massachusetts Eye Research & Surgery Institution  
Waltham, MA USA
28. Anat Galor, MD, MSPH  
Bascom Palmer Eye Institute  
University of Miami Miller School of Medicine  
Miami, FL USA
29. Sapna Gangaputra, MD, MPH  
Vanderbilt Eye Institute  
Nashville, TN USA
30. Debra A. Goldstein, MD, FRCS(C)  
Department of Ophthalmology  
Northwestern Feinberg School of Medicine  
Chicago, IL USA
31. Elizabeth M. Graham, FRCP, FRCOphth  
Medical Eye Unit  
St. Thomas Hospital  
London, UK
32. David C. Gritz, MD, MPH  
Case Western University School of Medicine  
Cleveland Clinic Abu Dhabi  
Abu Dhabi, United Arab Emirates
33. Amod Gupta, MD  
Department of Ophthalmology  
Postgraduate Institute of Medical Education & Research  
Chandigarh, India
34. Vishali Gupta, MD  
Advanced Eye Centre  
Post Graduate Institute of Medical Education and Research  
Chandigarh, India
35. Zohar Habot-Wilner, MD  
Department of Ophthalmology  
Tel Aviv Medical Center, Tel Aviv University  
Tel Aviv, Israel

## SUN Credit Roster

---

36. Gary N. Holland, MD  
UCLA Stein Eye Institute  
David Geffen School of Medicine at UCLA  
Los Angeles, CA USA
  
37. Douglas A. Jabs, MD, MBA  
Department of Epidemiology  
The Johns Hopkins University Bloomberg School of Public Health  
Department of Ophthalmology  
The Johns Hopkins University School of Medicine  
Baltimore, MD USA
  
38. Glenn J. Jaffe, MD  
Duke Eye Center  
Duke University  
Durham, NC USA
  
39. Henry J. Kaplan, MD  
Ocular Sciences, LLC  
St. Louis, MO USA
  
40. Sanjay Kedhar, MD  
Department of Ophthalmology  
University of California, Irvine School of Medicine  
Irvine, CA USA
  
41. Hiroshi Keino, MD, DMSc  
Kyorin Eye Center  
Kyorin University School of Medicine  
Tokyo, Japan
  
42. John H. Kempen, MD, MPH, MHS, PhD  
Department of Ophthalmology  
Massachusetts Eye and Ear/Schepens Eye Research Institute  
Harvard Medical School  
MCM General Hospital and MyungSung Medical  
Boston, MA USA and Addis Ababa, Ethiopia
  
43. Stephen J. Kim, MD  
Vanderbilt Eye Institute  
Vanderbilt University Medical Center  
Nashville, TN USA

## SUN Credit Roster

---

44. Nobuyoshi Kitaichi, MD, PhD  
Department of Ophthalmology  
Hokkaido University  
Sapporo, Hokkaido Japan
  
45. Michal Kramer, MD  
Department of Ophthalmology  
Rabin Medical Center, Petah-Tikva  
Sackler School of Medicine, Tel Aviv University  
Tel Aviv, Israel
  
46. Lucia Kuffova, MD, PhD, FRCOphth  
Institute of Medical Sciences  
University of Aberdeen  
Scotland, United Kingdom
  
47. Phuc LeHoang, MD, PhD  
Department of Ophthalmology  
Sorbonne University  
University of Paris VI, Hopital Pitie-Salpetriere  
Paris, France
  
48. Ralph Levinson, MD  
UCLA Stein Eye Institute  
David Geffen School of Medicine at UCLA  
Los Angeles, CA USA
  
49. Susan Lightman, PhD, FRCOphth  
Institute of Ophthalmology  
University College London and Moorfields Eye Hospital  
London, England United Kingdom
  
50. Lyndell L. Lim, MBBS, DMedSci  
Centre for Eye Research Australia  
Royal Victorian Eye & Ear Hospital  
East Melbourne, Australia
  
51. Ann-Marie Lobo, MD  
Department of Ophthalmology  
Massachusetts Eye and Ear  
Harvard Medical School  
Boston, MA USA

## SUN Credit Roster

---

52. Careen Y. Lowder, MD, PhD  
Cole Eye Institute  
The Cleveland Clinic Foundation  
Cleveland, OH USA
53. Todd Margolis, MD, PhD  
John F. Hardesty Department of Ophthalmology and Visual Sciences  
Washington University School of Medicine  
St. Louis, MO USA
54. Peter J. McCluskey, MD  
Department of Ophthalmology  
Sydney Eye Hospital  
University of Sydney School of Medicine  
Sydney, NSW, Australia
55. Manabu Mochizuki, MD  
Miyata Eye Hospital  
Miyazaki, Japan
56. Cristina Muccioli, MD, PhD  
Department of Ophthalmology  
Federal University of São Paulo  
São Paulo, Brazil
57. Philip I. Murray, PhD, FRCP, FRCS, FRCOphth  
Academic Unit of Ophthalmology  
University of Birmingham  
Birmingham and Midland Eye Centre  
Sandwell and West Birmingham Hospitals NHS Trust  
Birmingham, United Kingdom
58. Ken-ichi Namba, MD, PhD  
Department of Ophthalmology  
Hokkaido University  
Sapporo, Hokkaido Japan
59. Heloisa Nascimento, MD, PhD  
Vision Institute  
Universidade Federal de Sao Paulo  
Sao Paulo, Brazil

## SUN Credit Roster

---

60. Piergiorgio Neri, BMedSc, MD, PhD, FEBOphth  
Department of Ophthalmology  
Cleveland Clinic Lerner College of Medicine, Case Western Reserve University  
Cleveland Clinic  
Cleveland, OH USA and Abu Dhabi, United Arab Emirates
61. Neal Oden, PhD  
Emmes Company, LLC  
Rockville, MD USA
62. Shigeaki Ohno, MD, PhD  
Department of Ophthalmology  
Hokkaido University  
Sapporo, Hokkaido Japan
63. Annabelle A. Okada, MD, DMSc  
Kyorin Eye Center  
Kyorin University School of Medicine  
Tokyo, Japan
64. Jeong Won Pak, PhD  
Fundus Photograph Reading Center  
Department of Ophthalmology and Visual Sciences  
University of Wisconsin School of Medicine and Public Health  
Madison, WI USA
65. Alan G. Palestine, MD  
Department of Ophthalmology  
University of Colorado School of Medicine  
Aurora, CO USA
66. Jan S. Peterson, MS, CCRA, RAC, ASQ CBA, ACRP-CP  
Emmes Company, LLC  
Rockville, MD USA
67. Paola Pivetti-Pezzi, MD  
Istituto di Oftalmologia  
Sapienza University of Rome  
Rome, Italy
68. Tisha Prabripataloong-Stanzel, MD  
Department of Ophthalmology, Ramathibodi Hospital  
Mahidol University  
Mettapracharak Eye Center, Mettapracharak Hospital  
Nakornpathom, Thailand and Bangkok, Thailand



## SUN Credit Roster

---

69. Jose S. Pulido, MD, MS, MPH  
Department of Ophthalmology  
Mayo Clinic  
Rochester, MN USA
70. Narsing A. Rao, MD  
USC Roski Eye Institute, Department of Ophthalmology  
University of Southern California School of Medicine  
Los Angeles, CA USA
71. Russell W. Read, MD, PhD  
Department of Ophthalmology and Visual Sciences  
University of Alabama at Birmingham School of Medicine  
Birmingham, AL USA
72. Susan Reed, BS  
Fundus Photograph Reading Center  
Department of Ophthalmology and Visual Sciences  
University of Wisconsin School of Medicine and Public Health  
Madison, WI USA
73. James T. Rosenbaum, MD  
Departments of Medicine and Ophthalmology  
Oregon Health and Science University  
Portland, OR USA
74. Aniki Rothova, MD, PhD  
Department of Ophthalmology  
Erasmus Medical Center  
Rotterdam, Netherlands
75. Sophia Saleem, MD  
Department of Ophthalmology  
Icahn School of Medicine at Mount Sinai  
New York, NY USA
76. C. Michael Samson, MD, MBA  
Department of Ophthalmology  
Ophthalmology at MEETH  
Northwell Health  
New York, NY USA
77. H. Nida Sen, MD  
National Eye Institute  
National Institutes of Health  
Bethesda, MD USA

## SUN Credit Roster

---

78. Lazha Sharief, MD, PhD  
UCL/Institute of Ophthalmology and Moorfields Eye Hospital  
London, England United Kingdom
79. Shiri Shulman, MD  
Department of Ophthalmology  
Tel Aviv Medical Center, Tel Aviv University  
Tel Aviv, Israel
80. Justine R. Smith, FRANZCO, PhD  
Matthew Flinders Distinguished Professor of Eye and Vision Health  
Flinders University College of Medicine and Public Health  
Adelaide, Australia
81. Wendy M. Smith, MD  
Assistant Professor of Ophthalmology  
Mayo Clinic  
Rochester, MN USA
82. Sunil Srivastava, MD  
Cole Eye Institute  
The Cleveland Clinic Foundation  
Cleveland, OH USA
83. Miles Stanford, MD  
Medical Eye Unit  
Guy's and St. Thomas' Hospital  
London, England United Kingdom
84. Richard Stawell, MD  
Centre for Eye Research Australia  
Royal Victorian Eye & Ear Hospital  
East Melbourne, Australia
85. Eric B. Suhler, MD, MPH  
Casey Eye Institute  
Oregon Health & Science University  
VA Portland Health Care System  
Portland, OR USA
86. Jennifer E. Thorne, MD, PhD  
Department of Ophthalmology  
The Wilmer Eye Institute, The Johns Hopkins University School of Medicine  
Baltimore, MD USA

## SUN Credit Roster

---

87. Oren Tomkins Netzer, MD, PhD  
UCL/Institute of Ophthalmology and Moorfields Eye Hospital  
London, England United Kingdom
88. Christine Toutain-Kidd, PhD  
Department of Surgery, Section of Ophthalmology  
Dartmouth Hitchcock Medical Center  
Lebanon, NH USA
89. Brett E. Trusko, PhD, MBA  
Department of Medicine  
Texas A&M Health Science Center, Texas A&M University  
Houston, TX USA
90. Russell N. Van Gelder, MD, PhD  
Department of Ophthalmology  
University of Washington School of Medicine  
Seattle, WA USA
91. Albert Vitale, MD  
Department of Ophthalmology & Visual Sciences  
University of Utah School of Medicine  
Salt Lake City, UT USA
92. Denis Wakefield, MD  
School of Medical Sciences  
University of New South Wales  
Sydney, Australia
93. Sheila Watson, DVM  
Fundus Photograph Reading Center  
Department of Ophthalmology and Visual Sciences  
University of Wisconsin School of Medicine and Public Health  
Madison, WI USA
94. François Willermain, MD  
Saint-Pierre University Hospital  
Brussels, Belgium
95. Susan E. Wittenberg, MD  
Houston Eye Associates  
Houston, TX USA

## SUN Credit Roster

---

96. Steven Yeh, MD  
Department of Ophthalmology, Emory Eye Center  
Emory University School of Medicine  
Atlanta, GA USA
97. Ehud Zamir, MD, FRANZCO  
Centre for Eye Research Australia  
Royal Victorian Eye & Ear Hospital  
East Melbourne, Australia
98. Michael E. Zegans, MD  
Department of Surgery, Section of Ophthalmology  
Dartmouth Hitchcock Medical Center  
Lebanon, NH USA
99. Manfred Zierhut, MD  
Centre for Ophthalmology  
University of Tuebingen  
Tuebingen, Germany

## SUN Credit Roster

---

### Executive Committee:

1. Douglas A. Jabs, MD, MBA  
Department of Epidemiology  
The Johns Hopkins University Bloomberg School of Public Health  
Department of Ophthalmology  
The Johns Hopkins University School of Medicine  
Baltimore, MD USA
2. Peter J. McCluskey, MD  
Department of Ophthalmology  
Sydney Eye Hospital  
University of Sydney School of Medicine  
Sydney, NSW, Australia
3. Neal Oden, PhD  
Emmes Company, LLC  
Rockville, MD USA
4. Alan G. Palestine, MD  
Department of Ophthalmology  
University of Colorado School of Medicine  
Aurora, CO USA
5. Jan S. Peterson, MS, CCRA, RAC, ASQ CBA, ACRP-CP  
Emmes Company, LLC  
Rockville, MD USA
6. Jennifer E. Thorne, MD, PhD  
Department of Ophthalmology  
The Wilmer Eye Institute, The Johns Hopkins University School of Medicine  
Baltimore, MD USA
7. Brett E. Trusko, PhD, MBA  
Department of Medicine  
Texas A&M Health Science Center, Texas A&M University  
Houston, TX USA

**Steering Committee:**

1. Rubens Belfort, Jr., MD, PhD, MBA  
Vision Institute  
Federal University of Sao Paulo  
Sao Paulo, Brazil
2. Andrew D. Dick, FBS, FMedSci  
Academic Unit of Ophthalmology  
Bristol Medical School  
Bristol, United Kingdom
3. Douglas A. Jabs, MD, MBA  
Department of Epidemiology  
The Johns Hopkins University Bloomberg School of Public Health  
Department of Ophthalmology  
The Johns Hopkins University School of Medicine  
Baltimore, MD USA
4. Peter J. McCluskey, MD  
Department of Ophthalmology  
Sydney Eye Hospital  
University of Sydney School of Medicine  
Sydney, NSW, Australia
5. Neal Oden, PhD  
Emmes Company, LLC  
Rockville, MD USA
6. Annabelle A. Okada, MD, DMSc  
Kyorin Eye Center  
Kyorin University School of Medicine  
Tokyo, Japan
7. Alan G. Palestine, MD  
Department of Ophthalmology  
University of Colorado School of Medicine  
Aurora, CO USA
8. Jan S. Peterson, MS, CCRA, RAC, ASQ CBA, ACRP-CP  
Emmes Company, LLC  
Rockville, MD USA

## SUN Credit Roster

---

9. James T. Rosenbaum, MD  
Departments of Medicine and Ophthalmology  
Oregon Health and Science University  
Portland, OR USA
  
10. Jennifer E. Thorne, MD, PhD  
Department of Ophthalmology  
The Wilmer Eye Institute, The Johns Hopkins University School of Medicine  
Baltimore, MD USA
  
11. Brett E. Trusko, PhD, MBA  
Department of Medicine  
Texas A&M Health Science Center, Texas A&M University  
Houston, TX USA
