# Supplementary material
Source: PubMed Central journal article supplement (PMC8489730)
Supplement: NIHMS1698101-supplement-Supplemental_Figure.pdf [file NIHMS1698101-supplement-Supplemental_Figure.pdf]

CASE REPORT - POSTERIOR CASES

**DEMOGRAPHIC**

DIAGNOSIS  CASE ID  Page 1 of 2  
 Date of Presentation  Age at Diagnosis  Disease Type   
 Date of Diagnosis  Gender   
 Race  Specify Other

**HISTORY AT PRESENTATION**

Onset  Course  Acute Course   
 Duration  Eyes Effected

**Systemic Diseases**

Choose all that apply

**Immunodeficiency or Immunosuppression**

Choose all that apply

**Other Pertinent History**

|                                                                                                     |                                                                                                     |
|-----------------------------------------------------------------------------------------------------|-----------------------------------------------------------------------------------------------------|
| <b>General</b>                                                                                      |                                                                                                     |
| Best Corrected Visual Acuity (RE) <input type="text" value="20"/> / <input type="text" value="20"/> | Best Corrected Visual Acuity (LE) <input type="text" value="20"/> / <input type="text" value="30"/> |
| Non-Numeric V.A. (RE) <input type="text"/>                                                          | Non-Numeric V.A. (LE) <input type="text"/>                                                          |
| Intraocular Pressure (RE) <input type="text" value="18"/>                                           | Intraocular Pressure (LE) <input type="text" value="16"/>                                           |

|                                                             |                                                                 |
|-------------------------------------------------------------|-----------------------------------------------------------------|
| <b>Anterior Segment Findings</b>                            |                                                                 |
| Keratic Precipitates (RE) <input type="text" value="None"/> | Keratic Precipitates (LE) <input type="text" value="Stellate"/> |
| Location (RE) <input type="text"/>                          | Location (LE) <input type="text" value="Diffuse"/>              |

|                                                                                     |                                                                                      |
|-------------------------------------------------------------------------------------|--------------------------------------------------------------------------------------|
| <b>Other Pertinent Corneal Findings</b>                                             |                                                                                      |
| Other Pertinent Corneal Findings <input type="text"/>                               |                                                                                      |
| Ant. Chamber Cells (RE) <input type="text" value="0 (Cells in field = &lt;1)"/>     | Ant. Chamber Cells (LE) <input type="text" value="1+ (Cells in field = 6-15)"/>      |
| Ant. Chamber Cells Hypopyon (RE) <input type="text" value="No"/>                    | Ant. Chamber Cells Hypopyon (LE) <input type="text" value="No"/>                     |
| Ant. Chamber Flare (RE) <input type="text" value="0 (None)"/>                       | Ant. Chamber Flare (LE) <input type="text" value="1+ (Faint)"/>                      |
| Iris Abnormal (RE) <input type="text" value="No"/> If yes (RE) <input type="text"/> | Iris Abnormal (LE) <input type="text" value="Yes"/> If yes (LE) <input type="text"/> |
| Atrophy <input type="text"/>                                                        | Atrophy <input type="text" value="Diffuse"/>                                         |
| Synechia <input type="text"/>                                                       | Synechia <input type="text"/>                                                        |
| Heterochromia <input type="text"/>                                                  | Heterochromia <input type="text" value="Yes"/>                                       |
| Nodules <input type="text"/>                                                        | Nodules <input type="text"/>                                                         |

|                                                                                       |                                                 |
|---------------------------------------------------------------------------------------|-------------------------------------------------|
| <b>Anterior Segment Findings Cont.</b> Cataracts (RE) <input type="text" value="No"/> | Cataracts (LE) <input type="text" value="Yes"/> |
|---------------------------------------------------------------------------------------|-------------------------------------------------|

|                                                                                      |                                                       |
|--------------------------------------------------------------------------------------|-------------------------------------------------------|
| <b>Posterior Segment Findings</b> Vitreous Cells (RE) <input type="text" value="0"/> | Vitreous Cells (LE) <input type="text" value="0.5+"/> |
|--------------------------------------------------------------------------------------|-------------------------------------------------------|

|                                                                        |                                                      |
|------------------------------------------------------------------------|------------------------------------------------------|
| <b>Vitreous Haze</b> Vitreous Haze (RE) <input type="text" value="0"/> | Vitreous Haze (LE) <input type="text" value="0.5+"/> |
|------------------------------------------------------------------------|------------------------------------------------------|

|                                                         |                                                         |
|---------------------------------------------------------|---------------------------------------------------------|
| <b>Funduscopis Findings</b>                             |                                                         |
| Cup to Disk Ratio (RE) <input type="text" value="0.5"/> | Cup to Disk Ratio (LE) <input type="text" value="0.5"/> |
| Macular Edema (RE) <input type="text" value="Absent"/>  | Macular Edema (LE) <input type="text" value="Absent"/>  |
| Retinal Vascular Changes (RE) <input type="text"/>      | Retinal Vascular Changes (LE) <input type="text"/>      |

**Spots**

Spots (RE)  If yes (RE)  
Primary Tissue Involved   
Color  Shape   
Size  Focal   
Location in Retina   
Other Spot Descriptors

Spots (LE)  If yes (LE)  
Primary Tissue Involved   
Color  Shape   
Size  Focal   
Location in Retina   
Other Spot Descriptors

**Other Descriptors**

Other Descriptors (RE)

Other Descriptors (LE)

**Labs** Date   
FTA or MHA  Lyme Serology  ACE  Lysozyme   
HLA-A29  PPD  Quantiferon-Gold   
Other Labs   
Chest X-Ray  If Chest X-Ray Abnormal   
Chest CT  If Chest CT Abnormal

**Images** Color Photo  No  If no images - why?  
FA  No   
ICG  No   
OCT  No
